# Supplementary material for: Inhibitors of Activin Receptor-like Kinase 5 Interfere with SARS-CoV-2 S-Protein Processing and Spike-Mediated Cell Fusion via Attenuation of Furin Expression
Source: MDPI journal article supplement (doi:10.3390/v14061308), 2022-06-15
Supplement: s1 [file s1]

## Supplementary Materials

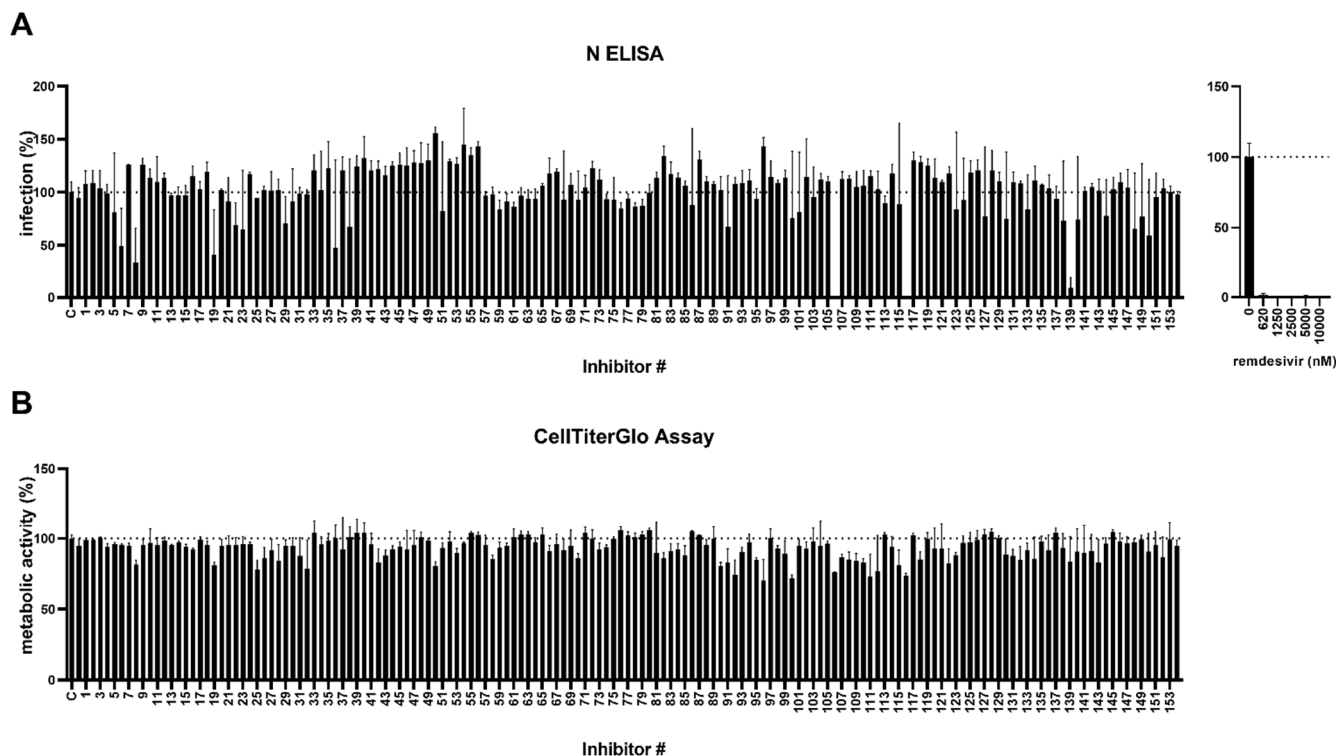

**Supplementary Figure S1. Screening of kinase inhibitors against SARS-CoV-2.** (a) Compounds were prediluted in medium and added onto Caco-2 cells (final conc. 1  $\mu$ M). Additionally, a titration series of the control inhibitor remdesivir was applied. Then, cells were infected with SARS-CoV-2 Alpha at a MOI of 0.0005. Two days later, infection was quantified by an in-cell ELISA which enzymatically quantifies nucleocapsid protein. Values were corrected for the background signal derived from uninfected cells and untreated controls were set to 100% infection. (b) In parallel, a viability assay was performed under conditions corresponding to the respective infection assay. After two days, metabolic activity of the cells was analyzed using the CellTiter-Glo® Luminescent Cell Viability Assay. Untreated controls were set to 100% viability. Shown are means  $\pm$  SD from one experiment in triplicates.

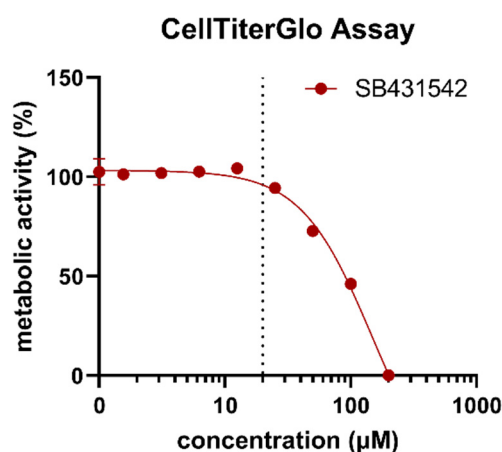

**Supplementary Figure S2. SB431542 is cytotoxic at concentrations higher than 25  $\mu$ M.** Calu-3 cells were treated with SB431542. Metabolic activity was determined two days post infection by CellTiterGlo assay. Values were normalized to untreated controls. Data are derived from one experiment performed in triplicates and represent are mean values  $\pm$  SD. Dotted line indicates highest concentration used in infection experiments (see Figure 7).

**Supplementary Table S1: List of kinase inhibitors and corresponding targets used for screening**

| #  | Inhibitor                  | Target                 |
|----|----------------------------|------------------------|
| 1  | TG003                      | CLK1<br>CLK4           |
| 2  | PKC 412                    | Multiple Kinases       |
| 3  | Doramapimod                | p38 MAPK               |
| 4  | Erlotinib                  | EGFR                   |
| 5  | PLX4032                    | B-RAF<br>B-RAV600E     |
| 6  | Phthalazinone pyrazole     | Aurora A               |
| 7  | AG-879                     | BMX                    |
| 8  | Torin 1                    | mTOR                   |
| 9  | BIBF 1120                  | FGFR<br>PDGFR<br>VEGFR |
| 10 | SMI-4a                     | PIMs                   |
| 11 | AS-703026                  | MEK1<br>MEK2           |
| 12 | Chelerythrine (chloride)   | PKC                    |
| 13 | R406                       | Syk                    |
| 14 | AZD 7762                   | Chk1<br>Chk2           |
| 15 | Dasatinib                  | Abl<br>LCK<br>Src      |
| 16 | GSK1059615                 | PI3K $\alpha$          |
| 17 | Ruxolitinib                | JAK1<br>JAK2           |
| 18 | Necrostatin-1              | RIPK1                  |
| 19 | INK128                     | mTOR                   |
| 20 | Bosutinib                  | Abl<br>EPHB2<br>Src    |
| 21 | Canertinib (hydrochloride) | EGFR                   |
| 22 | (R)-Crizotinib             | ALK<br>c-MET           |
| 23 | SB-431542 (hydrate)        | ALK5                   |
| 24 | PD 173074                  | FGFR1                  |
| 25 | PD 0325901                 | MEK                    |
| 26 | SB 203580                  | p38 MAPK               |
| 27 | VX-702                     | p38 MAPK               |
| 28 | Emodin                     | CK2                    |

|    |                                   |                               |
|----|-----------------------------------|-------------------------------|
| 29 | CHIR99021                         | GSK3 $\alpha$<br>GSK3 $\beta$ |
| 30 | BIO                               | GSK3 $\alpha$<br>GSK3 $\beta$ |
| 31 | Imatinib (mesylate)               | Multiple Kinases              |
| 32 | Sunitinib (malate)                | FLK1<br>FLT3<br>PDGFR $\beta$ |
| 33 | PP2                               | Fyn<br>HCK<br>LYN             |
| 34 | 3-Methyladenine                   | PI3K                          |
| 35 | Bisindolylmaleimide I             | PKC                           |
| 36 | Bisindolylmaleimide V             | S6K                           |
| 37 | D 4476                            | CK1                           |
| 38 | Gö 6983                           | PKC                           |
| 39 | H-9 (hydrochloride)               | PKG                           |
| 40 | Indirubin-3'-monoxime             | GSK3 $\beta$                  |
| 41 | NU 6102                           | Cdk1<br>Cdk2                  |
| 42 | KN-62                             | CAMKII                        |
| 43 | KN-93                             | CAMKII                        |
| 44 | CGP 57380                         | MNK1                          |
| 45 | (S)-Glycyl-H-1152 (hydrochloride) | ROCK-II                       |
| 46 | Bisindolylmaleimide IX (mesylate) | GSK3<br>PKC                   |
| 47 | SU6656                            | Yes                           |
| 48 | LY364947                          | ALK5                          |
| 49 | CAY10621                          | SPHK1                         |
| 50 | YM-201636                         | PIKfyve                       |
| 51 | ZM 447439                         | Aurora B                      |
| 52 | AS-041164                         | PI3K $\gamma$                 |
| 53 | NVP-AEW541 (hydrochloride)        | IGF-1R                        |
| 54 | PP242                             | mTOR                          |
| 55 | ABT-869                           | PDGFR family<br>VEGFR family  |
| 56 | CAY10622                          | ROCK-I<br>ROCK-II             |
| 57 | 17 $\beta$ -hydroxy Wortmannin    | PI3K                          |
| 58 | CAY10626                          | mTOR<br>PI3K $\alpha$         |

|    |                                    |                              |
|----|------------------------------------|------------------------------|
| 59 | SU 6668                            | Aurora B                     |
| 60 | PHA-665752                         | c-Met                        |
| 61 | BX-912                             | PDK1                         |
| 62 | Vatalanib (hydrochloride)          | VEGFR family                 |
| 63 | KRN 633                            | VEGFR family                 |
| 64 | LCK Inhibitor                      | LCK                          |
| 65 | BI-D1870                           | RSKs                         |
| 66 | CRT0066101 (hydrochloride)         | PKD                          |
| 67 | GNE-7915                           | LRRK2                        |
| 68 | GNF-5                              | Bcr-Abl                      |
| 69 | BMS 345541 (trifluoroacetate salt) | IKK $\alpha$<br>IKK $\beta$  |
| 70 | NVP-TAE226                         | FAK<br>PYK2 $\beta$          |
| 71 | AZ191                              | DYRK1B                       |
| 72 | Tie2 Kinase Inhibitor              | Tie2                         |
| 73 | Afuresertib (hydrochloride)        | PKB/Akt                      |
| 74 | GSK2334470                         | PDK1                         |
| 75 | JNK Inhibitor XVI                  | JNK1<br>JNK2<br>JNK3<br>JNKs |
| 76 | BI-6727                            | Plks                         |
| 77 | Syk Inhibitor II                   | Syk                          |
| 78 | PF-06463922                        | ALK                          |
| 79 | PF-562271 (besylate)               | FAK                          |
| 80 | BMS-777607                         | Axl family<br>Met family     |
| 81 | URMC-099                           | LRRK2<br>MLKs                |
| 82 | BGJ398                             | FGFR family                  |
| 83 | Mps1-IN-1                          | Mps1                         |
| 84 | WZ4003                             | NUAK1<br>NUAK2               |
| 85 | MLCK Inhibitor Peptide 18          | MLCK                         |
| 86 | AP26113                            | ALK                          |
| 87 | AZ 3146                            | Mps1                         |
| 88 | AZD 1208                           | PIMs                         |
| 89 | RPI-1                              | RET                          |
| 90 | LDN-211904                         | EphB3                        |

|     |                                 |                                                    |
|-----|---------------------------------|----------------------------------------------------|
| 91  | BMS-5                           | LIMK1<br>LIMK2                                     |
| 92  | TAS 120                         | FGFR family                                        |
| 93  | Apatinib                        | VEGFR2                                             |
| 94  | ARQ-092                         | PKB/Akt                                            |
| 95  | LY2606368                       | Chk1                                               |
| 96  | FRAX597                         | PAK1<br>PAK2<br>PAK3                               |
| 97  | KW 2449                         | Abl<br>FLT3                                        |
| 98  | UNC569                          | Axl family                                         |
| 99  | XMD16-5                         | TNK2                                               |
| 100 | VE-822                          | ATR                                                |
| 101 | Tilfrinib                       | BRK/PTK6                                           |
| 102 | AZD 0156                        | ATM                                                |
| 103 | LOXO-101                        | Trk family                                         |
| 104 | LOXO-195                        | Trk family                                         |
| 105 | U-0126                          | MEK                                                |
| 106 | Staurosporine                   | PKC                                                |
| 107 | Y-27632 (hydrochloride)         | ROCKs                                              |
| 108 | Leelamine                       | PDK                                                |
| 109 | PD 169316                       | p38 MAPK                                           |
| 110 | TGX-221                         | PI3K p110 $\beta$                                  |
| 111 | (S)-H-1152 (hydrochloride)      | ROCKs                                              |
| 112 | AS-605240                       | PI3K $\alpha,\beta,\delta,\gamma$<br>PI3K $\gamma$ |
| 113 | JNJ-10198409                    | PDGFR                                              |
| 114 | CAY10505                        | CK2                                                |
| 115 | PI-103                          | DNA-PK<br>mTOR<br>PI3K                             |
| 116 | PIK-75 (hydrochloride)          | PI3K p110 $\alpha$                                 |
| 117 | Sphingosine Kinase Inhibitor 2  | SPHK1                                              |
| 118 | SC-1                            | Stem Cell Renewal                                  |
| 119 | (R)-Roscovitine                 | CDKs                                               |
| 120 | Sorafenib                       | Multiple Kinases                                   |
| 121 | CAY10561                        | ERK2                                               |
| 122 | PI3-Kinase $\alpha$ Inhibitor 2 | PI3K $\alpha$                                      |
| 123 | ML-9                            | Multiple Kinases                                   |
| 124 | Erbstatin analog                | EGFR                                               |

|     |                         |                      |
|-----|-------------------------|----------------------|
| 125 | Kenpaullone             | CDKs<br>GSK3 $\beta$ |
| 126 | Olomoucine              | CDKs                 |
| 127 | AG-494                  | EGFR                 |
| 128 | AG-825                  | ErbB2                |
| 129 | AG-1478                 | EGFR                 |
| 130 | SB-216763               | GSK3                 |
| 131 | H-8 (hydrochloride)     | PKA<br>PKG           |
| 132 | LFM-A13                 | BTK                  |
| 133 | SC-514                  | IKK $\beta$          |
| 134 | RG-13022                | EGFR                 |
| 135 | AG-490                  | JAK2                 |
| 136 | AG-183                  | EGFR                 |
| 137 | Lavendustin C           | EGFR                 |
| 138 | GW 5074                 | Raf-1                |
| 139 | 5-Iodotubercidin        | CK1<br>ERK2<br>PKC   |
| 140 | SB 202190               | p38 MAPK             |
| 141 | CAY10571                | p38 $\alpha$ MAPK    |
| 142 | Nilotinib               | Bcr-Abl              |
| 143 | SP 600125               | JNKs                 |
| 144 | H-89 (hydrochloride)    | Multiple Kinases     |
| 145 | HA-1077 (hydrochloride) | ROCK-II              |
| 146 | AG-370                  | PDGFR                |
| 147 | Wortmannin              | PI3K<br>Plk1<br>Plk3 |
| 148 | AG-1296                 | PDGFR                |
| 149 | WHI-P131                | JAK3                 |
| 150 | CAY10574                | Cdk9                 |
| 151 | CAY10576                | IKK $\epsilon$       |
| 152 | TWS119                  | GSK3 $\beta$         |
| 153 | CAY10578                | CK2                  |
| 154 | PD 184161               | MEK1<br>MEK2         |
